# Supplementary material for: Family health climate scale (FHC-scale): development and validation
Source: PubMed Central journal article supplement (PMC4015295; doi:10.1186/1479-5868-11-30), 2014-03-05

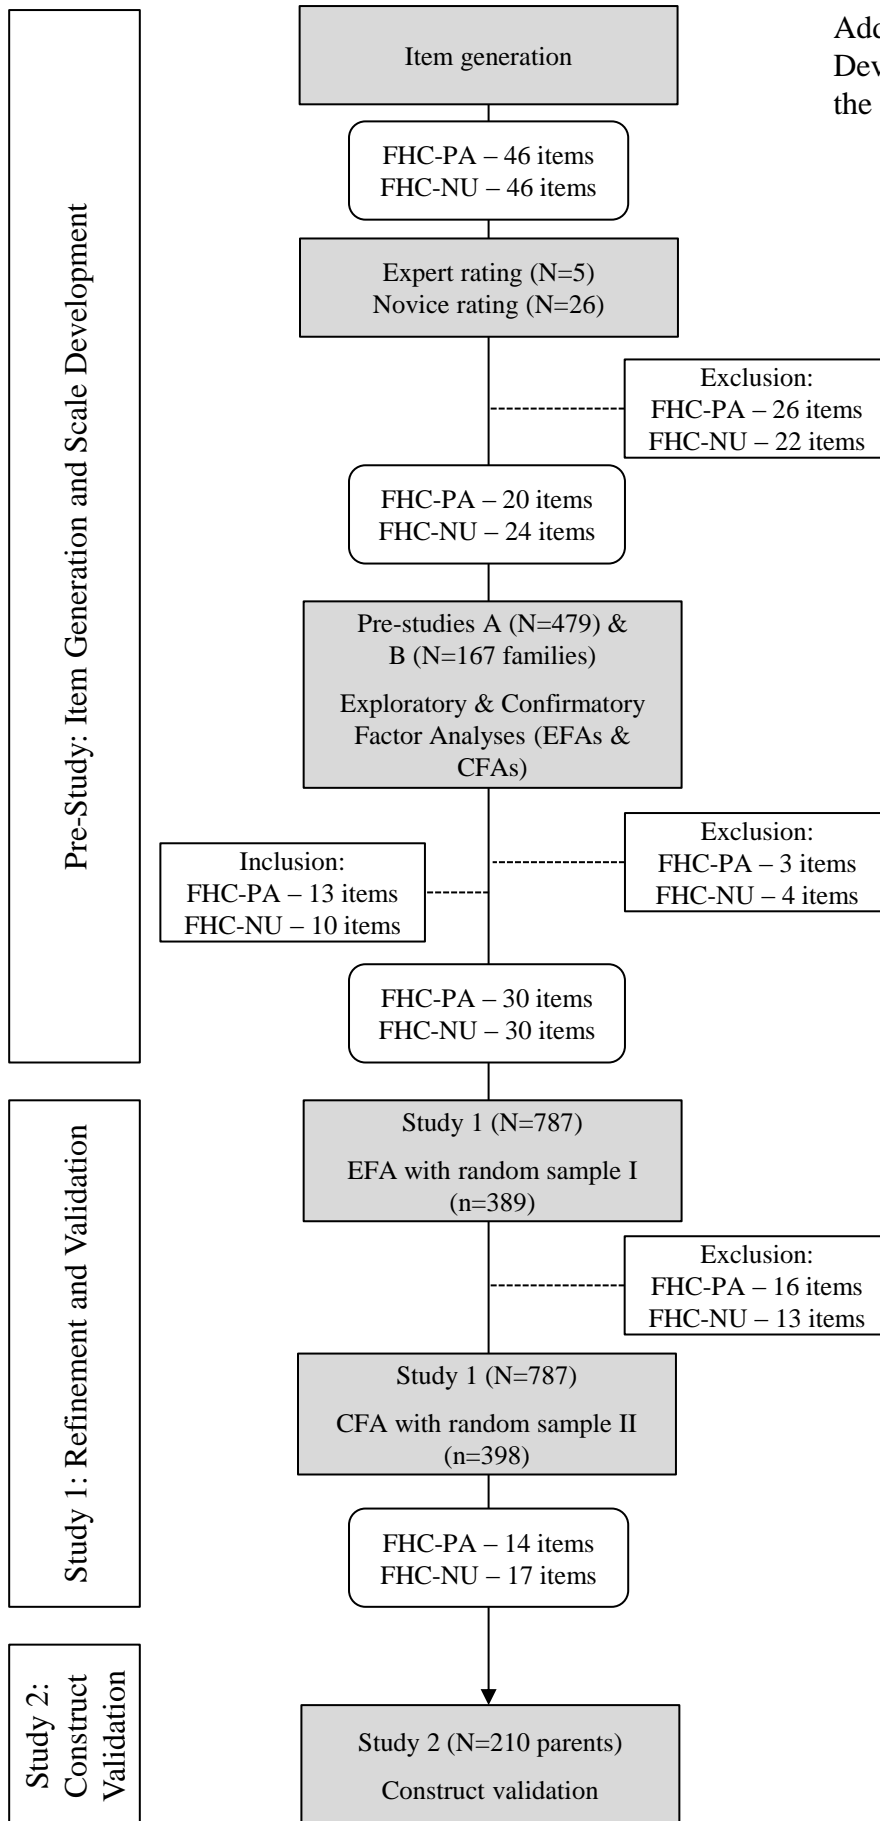

Supplement: 1479-5868-11-30-S1.pdf [file 1479-5868-11-30-S1.pdf]
