# Supplementary material for: Family health climate scale (FHC-scale): development and validation
Source: PubMed Central journal article supplement (PMC4015295; doi:10.1186/1479-5868-11-30), 2014-03-05
Supplement: 1479-5868-11-30-S2.pdf [file 1479-5868-11-30-S2.pdf]

## Additional File 2

### Skala zum gesundheitsbezogenen Familienklima (gFk-Skala)

#### In unserer Familie...

| <b>Körperliche Aktivität (gFk-A)</b>                                                                                         | <b>Ernährung (gFk-E)</b>                                                                           |
|------------------------------------------------------------------------------------------------------------------------------|----------------------------------------------------------------------------------------------------|
| <b>Stellenwert</b>                                                                                                           | <b>Stellenwert</b>                                                                                 |
| [1] ...legen wir großen Wert darauf, uns im Alltag viel zu bewegen.                                                          | [1] ...spielt eine gesunde Ernährung eine große Rolle.                                             |
| [2] ...ist es ganz normal, dass man regelmäßig körperlich aktiv ist.                                                         | [2] ...achten wir automatisch darauf, dass wir uns gesund ernähren.                                |
| [3] ...ist es selbstverständlich, regelmäßig Sport zu treiben und sich körperlich zu betätigen.                              | [3] ...ernähren wir uns gewohnheitsmäßig gesund.                                                   |
| [4] ...gehört es einfach dazu, dass wir uns in unserer Freizeit körperlich betätigen.                                        | [4] ...ist es ganz normal, dass wir zu gesunden Lebensmitteln greifen.                             |
| [5] ...sind wir einer Meinung, dass sportliche Aktivitäten zum Alltag dazu gehören.                                          |                                                                                                    |
| <b>Zusammenhalt</b>                                                                                                          | <b>Zusammenhalt</b>                                                                                |
| [1] ...mögen wir das Miteinander bei gemeinsamen körperlichen Aktivitäten (z.B. bei Radtouren, Wanderungen).                 | [1] ...schätzen wir das Miteinander beim Essen.                                                    |
| [2] ...sind wir gerne gemeinsam sportlich aktiv.                                                                             | [2] ...nimmt jeder gerne an gemeinsamen Mahlzeiten teil.                                           |
| [3] ...haben wir Spaß bei gemeinsamen körperlichen Aktivitäten (z.B. bei Radtouren, Wanderungen).                            | [3] ...gehören gemeinsame Mahlzeiten zu unserem Familienalltag dazu.                               |
| [4] ...finden wir es schön, gemeinsam sportlich aktiv zu sein.                                                               | [4] ...schmeckt es uns am besten, wenn wir gemeinsam am Tisch sitzen.                              |
| [5] ...verbringen wir gerne Zeit miteinander bei gemeinsamen sportlichen Aktivitäten.                                        | [5] ...versuchen wir so oft wie möglich gemeinsam zu essen.                                        |
| <b>Information</b>                                                                                                           | <b>Kommunikation</b>                                                                               |
| [1] ...schauen wir im Fernsehen Sendungen zum Thema „Bewegung und Sport“.                                                    | [1] ...interessieren wir uns für Beiträge (z.B. in Zeitschriften) zum Thema "gesunde Ernährung".   |
| [2] ...suchen wir gezielt nach aktuellen Erkenntnissen zum Thema „Sport und Bewegung“, um auf dem neuesten Stand zu bleiben. | [2] ...erinnern wir einander, auf eine gesunde Ernährung zu achten.                                |
| [3] ...sammeln wir Informationen (z.B. im Internet etc.) zum Thema „Sport und Bewegung“.                                     | [3] ...reden wir darüber, welche Lebensmittel gesund sind.                                         |
| [4] ...lesen wir Zeitungsartikel, Zeitschriftenbeiträge o. ä., in denen es um Fitness, Bewegung und Sport geht.              | [4] ...unterstützen wir einander dabei, auf ungesunde Dinge zu verzichten.                         |
|                                                                                                                              | [5] ...sprechen wir darüber, wie wir uns gesund ernähren können.                                   |
|                                                                                                                              | <b>Einigkeit</b>                                                                                   |
|                                                                                                                              | [1] ...gibt es selten Auseinandersetzungen in Bezug auf Essens- und Ernährungsangelegenheiten.     |
|                                                                                                                              | [2] ...sind wir uns in Ernährungsfragen einig.                                                     |
|                                                                                                                              | [3] ...sind wir meist einer Meinung, wenn es um unser Essen und die Auswahl der Lebensmittel geht. |

Rating-Skala: (0) trifft nicht zu; (1) trifft eher nicht zu; (2) trifft eher zu; (3) trifft zu
